# Supplementary material for: Comparing the performance of the novel FAMCAT algorithms and established case-finding criteria for familial hypercholesterolaemia in primary care
Source: HighWire-hosted journal article supplement (doi:10.1136/openhrt-2021-001752), 2021-10-01

## **Supplementary Material**

### **Comparing novel and established case-finding criteria for familial hypercholesterolaemia in primary care**

**Supplementary Table 1: Availability of standard diagnostic criteria variables in manual extraction from EHR**

|                                                                                                                                                       | Score | Number (%) |
|-------------------------------------------------------------------------------------------------------------------------------------------------------|-------|------------|
| <b>Dutch Lipid Criteria Network (DLCN)</b>                                                                                                            |       |            |
| <b>Family History</b>                                                                                                                                 |       |            |
| First-degree relative with premature coronary and/or vascular disease (men ≤ 55 years, women ≤ 60 year)                                               | 1     | 130 (50%)  |
| First-degree relative with known LDL-C ≥ 95 <sup>th</sup> percentile for age and sex                                                                  | 1     | -          |
| <b>Clinical history</b>                                                                                                                               |       |            |
| Patient with premature coronary artery disease (men ≤ 55 years, women ≤ 60 years)                                                                     | 2     | 22 (8.5)   |
| Patient with premature cerebral or peripheral vascular disease (men ≤ 55 years, women ≤ 60 years)                                                     | 1     | 4 (1.5)    |
| <b>Physical examination</b>                                                                                                                           |       |            |
| Tendon xanthomata                                                                                                                                     | 6     | 0          |
| Arcus cornealis at age ≤ 45 years                                                                                                                     | 4     | 0          |
| <b>LDL cholesterol level (mmol/L)</b>                                                                                                                 |       |            |
| ≥ 8.5                                                                                                                                                 | 8     | 4 (1.5)    |
| 6.5 – 8.4                                                                                                                                             | 5     | 14 (5.4)   |
| 5.0 – 6.4                                                                                                                                             | 3     | 121 (46.5) |
| 4.0 – 4.9                                                                                                                                             | 1     | 59 (22.7)  |
| <b>Simon Broome Diagnostic criteria</b>                                                                                                               |       |            |
| <b>Family History</b>                                                                                                                                 |       |            |
| Family history of myocardial infarction: aged younger than 50 years in second-degree relative or aged younger than 60 years in first-degree relative. | -     | 130 (50)   |
| Family history of raised total cholesterol: greater than 7.5 mmol/l in adult first- or second-degree relative)                                        | -     | 37 (14.2)  |
| <b>Clinical history</b>                                                                                                                               |       |            |
| Patient with premature coronary artery disease (men ≤ 55 years, women ≤ 60 years)                                                                     | -     | 22 (8.5)   |
| <b>Physical examination</b>                                                                                                                           |       |            |
| Tendon xanthomata                                                                                                                                     | -     | 0          |
| <b>Cholesterol level</b>                                                                                                                              |       |            |
| Total cholesterol > 7.5mmol/l or LDL-Cholesterol > 4.5 mmol/l                                                                                         | -     | 171 (65.8) |

**Continuation of Supplementary Table 1...**

|                                                                    | Score | Number (%)      |
|--------------------------------------------------------------------|-------|-----------------|
| <b>FAMCAT 1 algorithm</b>                                          |       |                 |
| Highest total or LDL cholesterol (mmol/L)                          | -     |                 |
| <i>Ideal (TC ≤ 5 or LDL ≤ 3.3)</i>                                 |       | 27 (10.4)       |
| <i>High (TC &gt; 5 to ≤ 6.5 OR LDL &gt; 3.3 to ≤ 4.1)</i>          |       | 30 (11.5)       |
| <i>Very High (TC &gt; 6.5 to ≤ 7.5 OR LDL &gt; 4.1 to ≤ 4.9)</i>   |       | 53 (20.4)       |
| <i>Extremely High (TC &gt; 7.5 OR LDL &gt; 4.9)</i>                |       | 150 (57.7)      |
| Age during cholesterol measurement (years)                         | -     |                 |
| <i>16-24</i>                                                       |       | 3 (1.2)         |
| <i>25-34</i>                                                       |       | 12 (4.6)        |
| <i>35-44</i>                                                       |       | 40 (15.4)       |
| <i>45-54</i>                                                       |       | 75 (28.9)       |
| <i>55-64</i>                                                       |       | 75 (28.9)       |
| <i>65-74</i>                                                       |       | 47 (18.1)       |
| <i>75-84</i>                                                       |       | 8 (3.1)         |
| <i>85 or above</i>                                                 |       | 0               |
| Triglycerides (mmol/L)                                             | -     |                 |
| <i>Ideal (&lt; 1.7)</i>                                            |       | 127 (48.9)      |
| <i>Borderline high (≥ 1.7 to &lt; 2.3)</i>                         |       | 51 (19.6)       |
| <i>High (≥ 2.3 to &lt; 5.6)</i>                                    |       | 68 (26.2)       |
| <i>Very high (≥ 5.6)</i>                                           |       | 7 (2.7)         |
| <i>Not Recorded</i>                                                |       | 7 (2.7)         |
| Treatment with lipid lowering drugs during cholesterol measurement | -     |                 |
| <i>No lipid lowering drugs prescribed</i>                          |       | 194 (74.6)      |
| <i>Low potency statins</i>                                         |       | 2 (0.8)         |
| <i>Medium potency statin</i>                                       |       | 47 (18.1)       |
| <i>High potency statins</i>                                        |       | 17 (6.5)        |
| Family history of myocardial infarction                            | -     | 131 (50.4)      |
| Family history of raised cholesterol                               | -     | 37 (14.2)       |
| Family history of familial hypercholesterolaemia                   | -     | 9 (3.5)         |
| Any diagnosis of diabetes                                          | -     | 16 (6.2)        |
| Any diagnosis of kidney disease                                    | -     | 7 (2.7)         |
| <b>FAMCAT 2 algorithm</b>                                          |       |                 |
| Highest LDL cholesterol ever (mmol/L), median (IQR)                | -     | 5.0 (4.2 – 5.6) |
| Highest total cholesterol ever (mmol/L), median (IQR)              | -     | 7.6 (6.7 – 8.2) |
| Age during cholesterol measurement (years), mean (SD)              | -     | 53.9 (12.1)     |
| Triglycerides (mmol/L), mean (SD)                                  | -     | 1.7 (1.3 – 2.5) |
| Previous history of premature myocardial infarction                | -     | 22 (8.5)        |

**Supplementary Table 2. FAMCAT performance** (detection rate, sensitivity, specificity, positive and negative predictive values, AUC) for identifying genetically-confirmed familial hypercholesterolaemia at pre-specified probability thresholds ( $n=260$ )

| Threshold       | FH Positive Above Threshold | FH Positive Below Threshold | Detection rate       | Sensitivity (95% CI) | Specificity (95% CI) | PPV* (95% CI)        | NPV* (95% CI)        | AUC (95% CI)       |
|-----------------|-----------------------------|-----------------------------|----------------------|----------------------|----------------------|----------------------|----------------------|--------------------|
| <b>FAMCAT 1</b> |                             |                             |                      |                      |                      |                      |                      |                    |
| 0.002           | 16/228                      | 0/32                        | 7.0% (4.4 – 11.1%)   | 100%                 | 13.1% (0.1 – 18.0%)  | 6.4% (5.7 – 6.8%)    | 100%                 | 0.57 (0.54 – 0.59) |
| 0.004           | 16/200                      | 0/60                        | 8.0% (5.0 – 12.6%)   | 100%                 | 24.6% (19.3 – 30.5%) | 7.3% (6.8 – 7.8%)    | 100%                 | 0.63 (0.60 – 0.65) |
| 0.010           | 16/159                      | 0/101                       | 10.1% (6.3 – 15.7%)  | 100%                 | 41.4% (35.1 – 47.9%) | 9.2% (8.4 – 10.1%)   | 100%                 | 0.71 (0.68 – 0.74) |
| 0.050           | 11/54                       | 5/206                       | 20.4% (11.8 – 32.9%) | 68.8% (41.3 – 89.0%) | 82.4% (77.0 – 86.9%) | 18.8% (12.9 – 25.7%) | 97.8% (95.6 – 98.8%) | 0.76 (0.64 – 0.88) |
| 0.080           | 8/32                        | 8/228                       | 25.0% (13.3 – 42.1%) | 50.0% (24.7 – 75.3%) | 90.2% (85.7 – 93.6%) | 23.2 (13.9 – 35.2%)  | 96.8% (95.0 – 98.0%) | 0.70 (0.57 – 0.83) |
| 0.100           | 6/22                        | 10/238                      | 27.3% (13.2 – 48.2%) | 37.5% (15.2 – 64.6%) | 93.4% (89.6 – 96.2%) | 25.3% (13.6 – 41.9%) | 96.2% (94.6 – 97.4%) | 0.65 (0.53 – 0.78) |
| 0.140           | 5/18                        | 11/242                      | 27.8% (12.5 – 50.9%) | 31.3% (11.0 – 58.7%) | 94.7% (91.1 – 97.1%) | 25.8% (12.8 – 45.2%) | 95.9% (94.4 – 97.0%) | 0.63 (0.51 – 0.75) |
| 0.150           | 5/16                        | 11/244                      | 31.3% (14.2 – 55.6%) | 31.3% (11.0 – 58.7%) | 95.5% (92.1 – 97.7%) | 29.1% (14.4 – 49.9%) | 95.9% (94.5 – 97.1%) | 0.63 (0.52 – 0.75) |
| 0.200           | 3/9                         | 13/251                      | 33.3% (12.1 – 64.6%) | 18.8% (4.0 – 45.6%)  | 97.5% (94.7 – 99.1%) | 31.1% (12.1 – 60.5%) | 95.3% (94.2 – 96.3%) | 0.58 (0.48 – 0.68) |
| 0.250           | 2/5                         | 14/255                      | 40.0% (11.8 – 76.9%) | 12.5% (1.6 – 38.3%)  | 98.8% (96.4 – 99.7%) | 37.6% (11.5 – 74.1%) | 95.0% (94.1 – 96.0%) | 0.56 (0.47 – 0.64) |
| <b>FAMCAT 2</b> |                             |                             |                      |                      |                      |                      |                      |                    |
| 0.002           | 12/79                       | 4/181                       | 15.2% (8.9 – 24.7%)  | 75.0% (47.6 – 92.7%) | 72.5% (66.5 – 78.0%) | 13.9% (10.0 – 18.3%) | 98.0% (95.4 – 99.0%) | 0.74 (0.62 – 0.85) |
| 0.0036          | 11/36                       | 5/224                       | 30.6% (18.0 – 46.9%) | 68.6% (41.3 – 89.0%) | 89.8% (85.2 – 93.3%) | 28.5% (19.1 – 38.7%) | 98.0% (95.9 – 98.9%) | 0.79 (0.67 – 0.91) |
| 0.004           | 11/29                       | 5/231                       | 37.9% (22.7 – 56.0%) | 68.8% (41.3 – 89.0%) | 92.6% (88.6 – 95.6%) | 35.6% (23.5 – 47.9%) | 98.0% (96.0 – 99.0%) | 0.81 (0.69 – 0.93) |
| 0.0047          | 11/24                       | 5/236                       | 45.8% (27.9 – 64.9%) | 68.8% (41.3 – 89.0%) | 94.7% (91.1 – 97.1%) | 43.4% (28.3 – 57.4%) | 98.1% (96.1 – 99.0%) | 0.82 (0.70 – 0.94) |
| 0.010           | 8/10                        | 9/250                       | 80.0% (49.0 – 94.3%) | 50.0% (24.7 – 75.3%) | 99.2% (97.1 – 99.9%) | 78.3% (43.7 – 91.6%) | 97.1% (95.4 – 98.2%) | 0.75 (0.62 – 0.87) |
| 0.050           | 3/3                         | 13/257                      | 100%                 | 18.8% (4.0 – 45.6%)  | 100%                 | 100%                 | 95.4% (94.3 – 96.4%) | 0.59 (0.49 – 0.69) |
| 0.100           | 2/2                         | 14/258                      | 100%                 | 12.5% (1.6 – 38.3%)  | 100%                 | 100%                 | 95.1% (94.2 – 96.0%) | 0.56 (0.48 – 0.65) |

\* Positive predictive value (PPV) and negative predictive value (NPV) assumes a prevalence of familial hypercholesterolaemia (FH) of 0.056 based on study.

AUC – area under the curve; CI – confidence interval; FH – familial hypercholesterolaemia; NPV – negative predictive value; PPV – positive predictive value.

Detection rate - 95% confidence interval calculated using the Wilson score interval discussed in Brown, LD, Cat, TT and DasGupta, A (2001). Interval Estimation for a proportion. *Statistical Science* 16:101-133.

**Supplementary Table 3. FAMCAT performance** (detection rate, sensitivity, specificity, positive and negative predictive values, AUC) for identifying genetically-confirmed familial hypercholesterolaemia at pre-specified probability thresholds (*n*=228)

| Threshold       | FH Positive Above Threshold | FH Positive Below Threshold | Detection rate       | Sensitivity (95% CI) | Specificity (95% CI) | PPV* (95% CI)        | NPV* (95% CI)        | AUC (95% CI)       |
|-----------------|-----------------------------|-----------------------------|----------------------|----------------------|----------------------|----------------------|----------------------|--------------------|
| <b>FAMCAT 1</b> |                             |                             |                      |                      |                      |                      |                      |                    |
| 0.004           | 16/200                      | 0/28                        | 8% (5.0 – 12.6%)     | 100%                 | 13.2% (9.0 – 18.5%)  | 6.4% (5.7 – 6.8%)    | 100%                 | 0.57 (0.54 – 0.59) |
| 0.010           | 16/159                      | 0/69                        | 10.1% (6.3 – 15.7%)  | 100%                 | 32.5% (26.3 – 39.3%) | 8.1% (7.0 – 8.8%)    | 100%                 | 0.66 (0.63 – 0.69) |
| 0.050           | 11/54                       | 5/174                       | 20.4% (11.8 – 32.9%) | 68.8% (41.3 – 89.0%) | 79.7% (73.7 – 84.9%) | 16.7% (11.4 – 23.1%) | 97.7% (95.4 – 98.8%) | 0.74 (0.62 – 0.86) |
| 0.085           | 8/30                        | 8/198                       | 26.6% (14.2 – 44.5%) | 50.0% (24.7 – 75.3%) | 89.6% (84.7 – 93.4%) | 22.2% (13.2 – 34.2%) | 96.8% (94.9 – 98.0%) | 0.70 (0.57 – 0.83) |
| 0.100           | 6/22                        | 10/206                      | 27.3% (13.2 – 48.2%) | 37.5% (15.2 – 64.4%) | 92.5% (88.0 – 95.6%) | 22.8% (12.0 – 38.5%) | 96.1% (94.5 – 97.3%) | 0.65 (0.53 – 0.77) |
| 0.160           | 4/14                        | 12/214                      | 28.6% (11.7 – 54.7%) | 25.0% (7.3 – 52.4%)  | 95.3% (91.5 – 97.7%) | 23.9% (10.6 – 46.1%) | 95.5% (94.2 – 96.7%) | 0.60 (0.49 – 0.71) |
| 0.150           | 5/16                        | 11/212                      | 31.3% (14.2 – 55.6%) | 31.3% (11.0 – 58.7%) | 94.8% (90.9 – 97.4%) | 26.3% (12.8 – 46.3%) | 95.9% (94.4 – 97.0%) | 0.63 (0.51 – 0.75) |
| 0.200           | 3/9                         | 13/219                      | 33.3% (12.1 – 64.6%) | 18.8% (4.0 – 45.6%)  | 97.2% (93.9 – 99.0%) | 28.2% (10.7 – 57.1%) | 95.3% (94.2 – 96.3%) | 0.58 (0.48 – 0.68) |
| 0.250           | 2/5                         | 14/223                      | 40.0% (11.8 – 76.9%) | 12.5% (1.6 – 38.3%)  | 98.6% (95.9 – 99.7%) | 34.4% (10.2 – 71.4%) | 95.0% (94.1 – 96.0%) | 0.56 (0.47 – 0.64) |
| <b>FAMCAT 2</b> |                             |                             |                      |                      |                      |                      |                      |                    |
| 0.002           | 12/78                       | 4/150                       | 15.4% (9.0 – 25.0%)  | 75.0% (47.6 – 92.7%) | 68.9% (62.2 – 75.0%) | 12.5% (9.0 – 16.5%)  | 97.9% (95.2 – 99.0%) | 0.72 (0.61 – 0.83) |
| 0.0038          | 11/33                       | 5/195                       | 33.3% (19.8 – 50.4%) | 68.6% (41.3 – 89.0%) | 89.6% (84.7 – 93.4%) | 28.2% (18.6 – 38.8%) | 98.0% (95.9 – 98.9%) | 0.79 (0.67 – 0.91) |
| 0.004           | 11/28                       | 5/200                       | 39.3% (23.6 – 57.6%) | 68.8% (41.3 – 89.0%) | 92.0% (87.5 – 95.3%) | 33.7% (21.9 – 46.0%) | 98.0% (96.0 – 99.0%) | 0.80 (0.68 – 0.92) |
| 0.0047          | 10/20                       | 6/208                       | 50.0% (29.9 – 70.1%) | 62.5% (35.4 – 84.8%) | 95.3% (91.5 – 97.7%) | 44.0% (27.0 – 59.9%) | 97.7% (95.8 – 98.7%) | 0.79 (0.67 – 0.91) |
| 0.010           | 8/10                        | 8/218                       | 80.0% (49.0 – 94.3%) | 50.0% (24.7 – 75.3%) | 99.1% (96.6 – 99.9%) | 75.9% (40.3 – 90.4%) | 97.1% (95.4 – 98.2%) | 0.75 (0.62 – 0.87) |
| 0.050           | 3/3                         | 13/225                      | 100%                 | 18.8% (4.0 – 45.6%)  | 100%                 | 100%                 | 95.4% (94.3 – 96.4%) | 0.59 (0.49 – 0.69) |
| 0.100           | 2/2                         | 14/226                      | 100%                 | 12.5% (1.6 – 38.3%)  | 100%                 | 100%                 | 95.1% (94.2 – 96.0%) | 0.56 (0.48 – 0.65) |

\* Positive predictive value (PPV) and negative predictive value (NPV) assumes a prevalence of familial hypercholesterolaemia (FH) of 0.056 based on study.

AUC – area under the curve; CI – confidence interval; FH – familial hypercholesterolaemia; NPV – negative predictive value; PPV – positive predictive value.

Detection rate - 95% confidence interval calculated using the Wilson score interval discussed in Brown, LD, Cat, TT and DasGupta, A (2001). Interval Estimation for a proportion. *Statistical Science* 16:101-133.

**Supplementary Figure 1: ROC curve and sensitivity of FAMCAT 1 & FAMCAT2 algorithms at 95% specificity (n=228)**

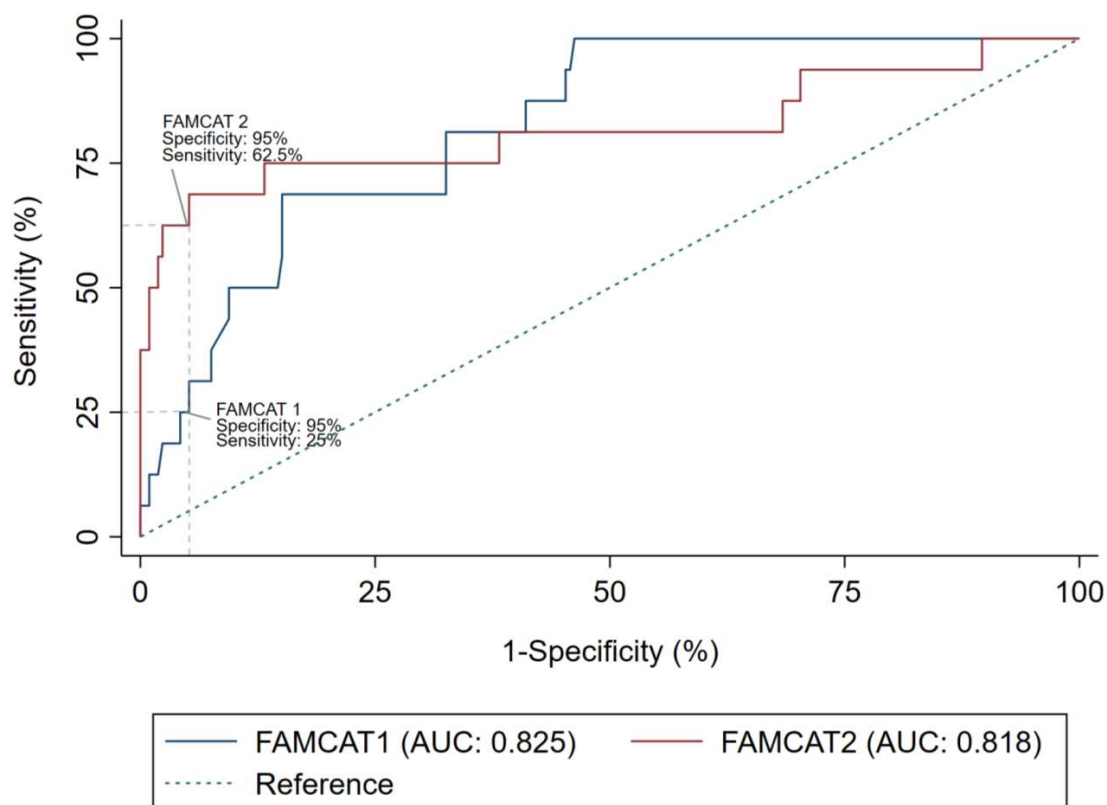

Supplement: openhrt-2021-001752supp001_data_supplement.pdf [file openhrt-2021-001752supp001_data_supplement.pdf]
